# Supplementary material
Source: publisher site journal article supplement (https://neobiota.pensoft.net/article/30392/download/suppl/36/)
Supplement: Supplementary file 1

Species	Vectory	Latitude	Longtitude
Plantago_virginica	CFA	26.0282	119.2071
Plantago_virginica	CFB	26.061	119.1949
Plantago_virginica	CHB	30.544	114.4074
Plantago_virginica	CJB	28.6873	115.934
Plantago_virginica	CJD	28.6881	115.9221
Plantago_virginica	CJE	28.6531	115.7908
Plantago_virginica	CNA	32.0519	118.8275
Plantago_virginica	CNB	32.0403	118.8743
Plantago_virginica	CSA	31.1462	121.4366
Plantago_virginica	CZJ	29.1358	119.6415
Plantago_virginica	UCA	33.823	-116.537
Plantago_virginica	UFA	29.6352	-82.3389
Plantago_virginica	UGA	32.4023	-81.7551
Plantago_virginica	UGB	34.422	-81.7923
Plantago_virginica	UGC	32.5636	-82.0344
Plantago_virginica	UNB	36.2529	-79.7569
Plantago_virginica	UNC	34.7224	-76.7584
Plantago_virginica	UOC	35.6961	-97.2869
Plantago_virginica	UOA	35.7315	-97.2867
Plantago_virginica	USA	33.3328	-81.2965
Plantago_virginica	USB	34.912	-80.9743
Plantago_virginica	UVA	38.0928	-78.0928
